# Supplementary material for: Synthesis and study of low-bandgap polymers containing the diazapentalene and diketopyrrolopyrrole chromophores for potential use in solar cells and near-infrared photodetectors
Source: Royal Society of Chemistry journal article supplement (doi:10.1039/c2jm30868a), 2012-01-01
Supplement: c2jm30868a.pdf [file c2jm30868a.pdf]

# Supporting Information

## **Synthesis and Study of Low-Bandgap Polymers Containing the Diazapentalene and Diketopyrrolopyrrole Chromophores for Potential Use in Solar Cells and Near-Infrared Photodetectors**

*Gang Qian,<sup>a</sup> Ji Qi<sup>bc</sup> and Zhi Yuan Wang<sup>\*ab</sup>*

<sup>a</sup> Department of Chemistry, Carleton University, 1125 Colonel By Drive, Ottawa, Ontario, Canada K1S 5B6, <sup>b</sup> State Key Laboratory of Polymer Physics and Chemistry, Changchun Institute of Applied Chemistry, Chinese Academy of Sciences, Changchun, 130022, China, <sup>c</sup> Graduate School of Chinese Academy of Science, Beijing, 100039, China.

\* To whom all the correspondence should be addressed. E-mail:

[wayne\\_wang@carleton.ca](mailto:wayne_wang@carleton.ca)

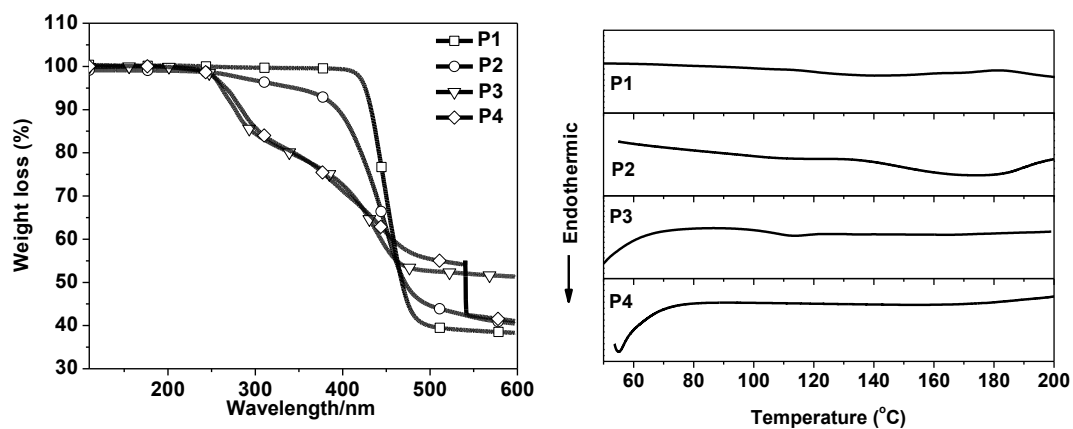

Figure S1. TGA (left) and DSC (right) traces of copolymers **P1-P4** with a heating rate of  $10\text{ }^{\circ}\text{C min}^{-1}$  under argon. DSC traces were taken from the second DSC scans.

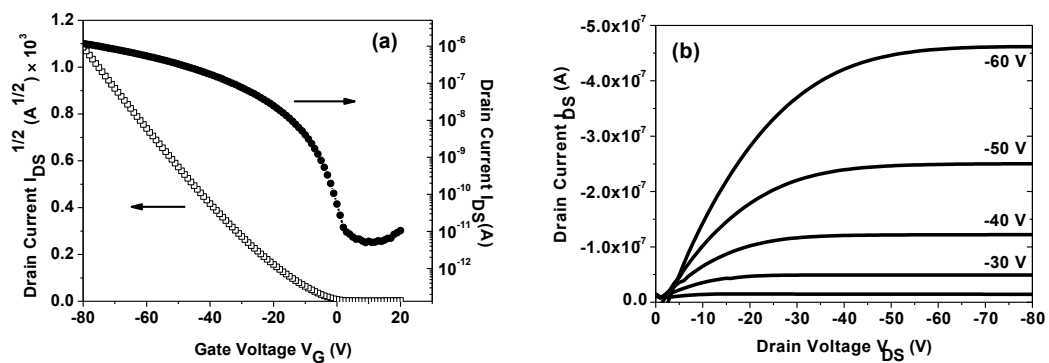

Figure S2. Characteristics of OTFT based on **P2**. (a) Output curves and (b) transfer curves of the devices.

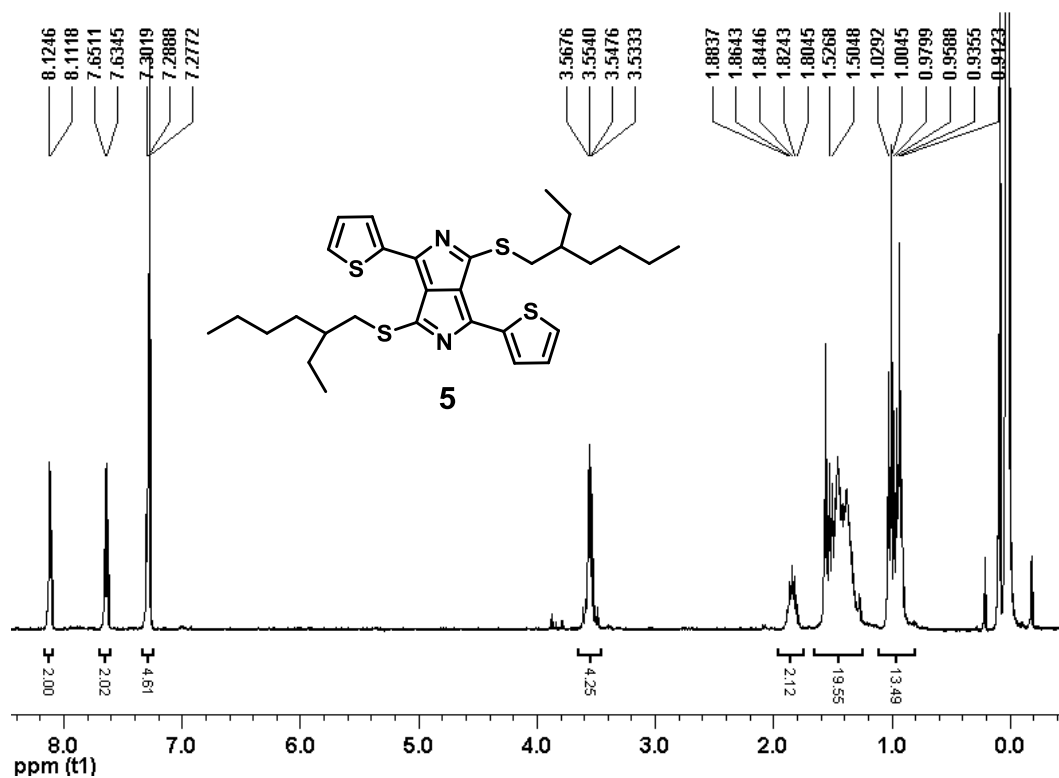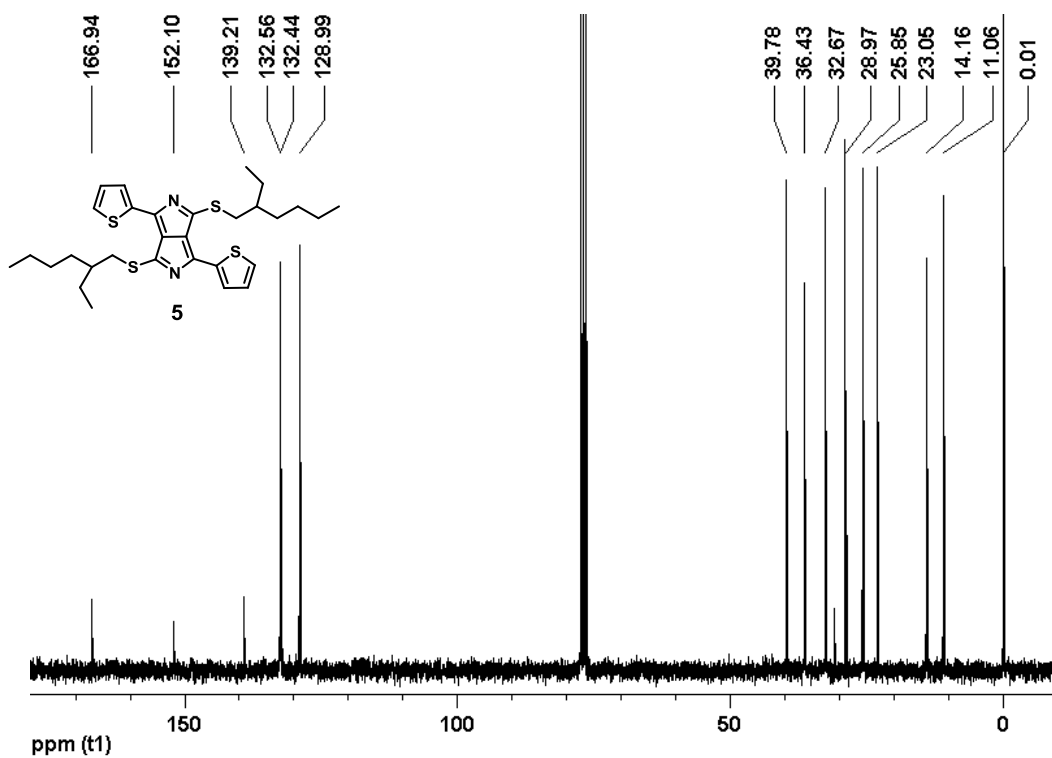

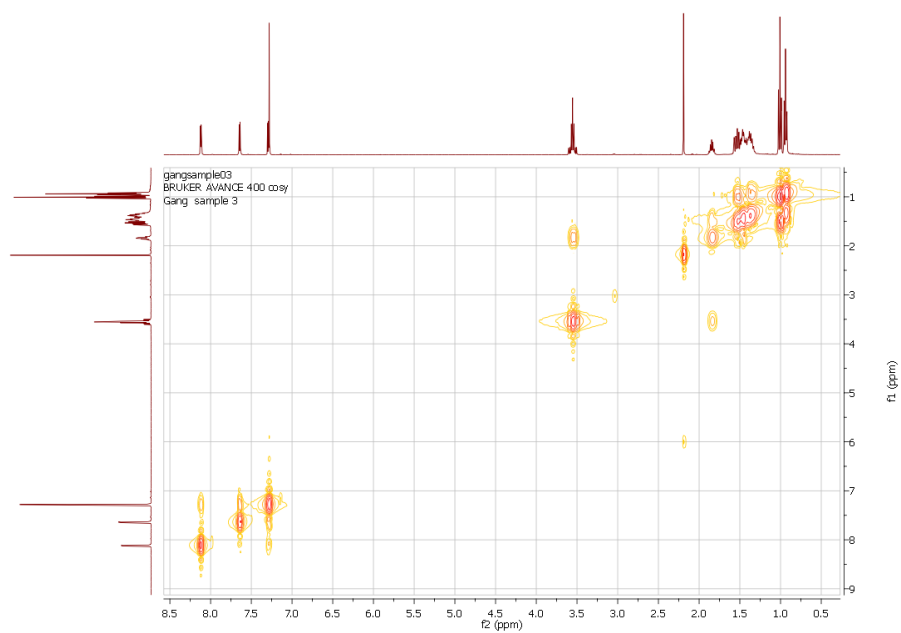

$^1\text{H}$ - $^1\text{H}$  COSY of **5** in  $\text{CDCl}_3$ .

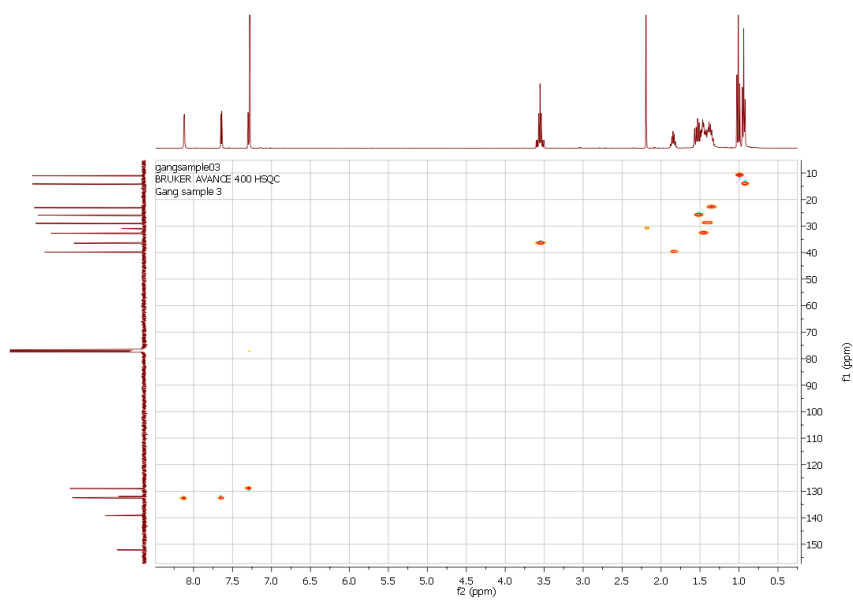

$^1\text{H}$ - $^{13}\text{C}$  HSQC of **5** in  $\text{CDCl}_3$ .

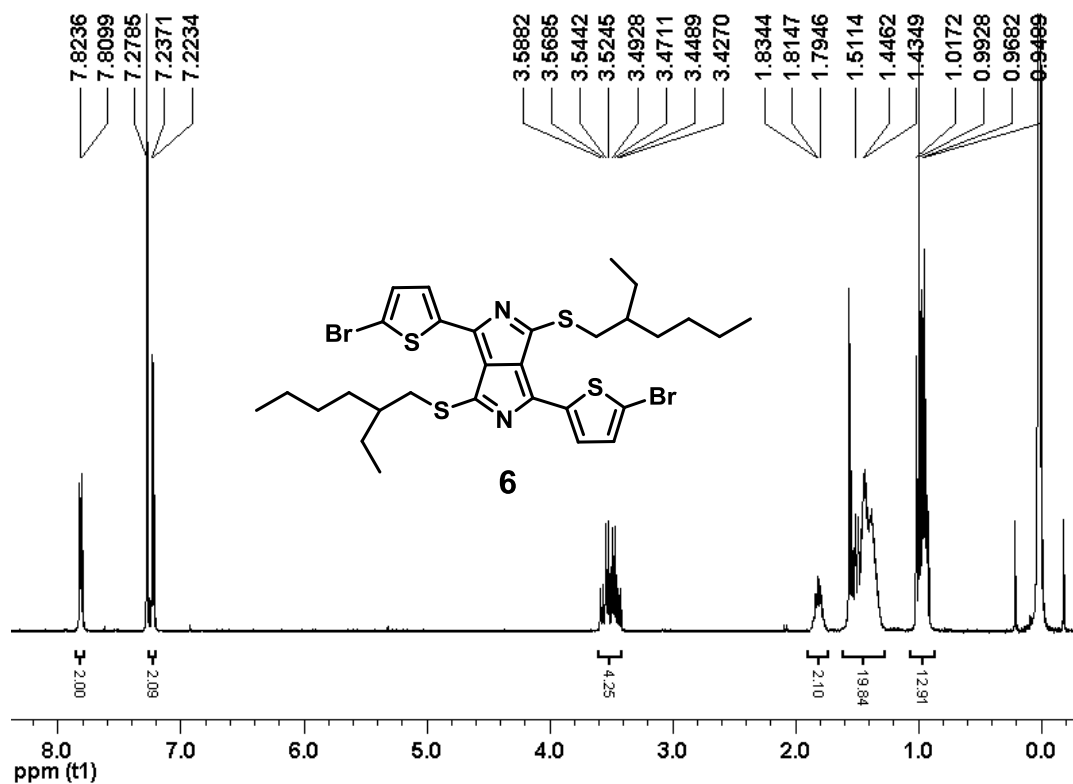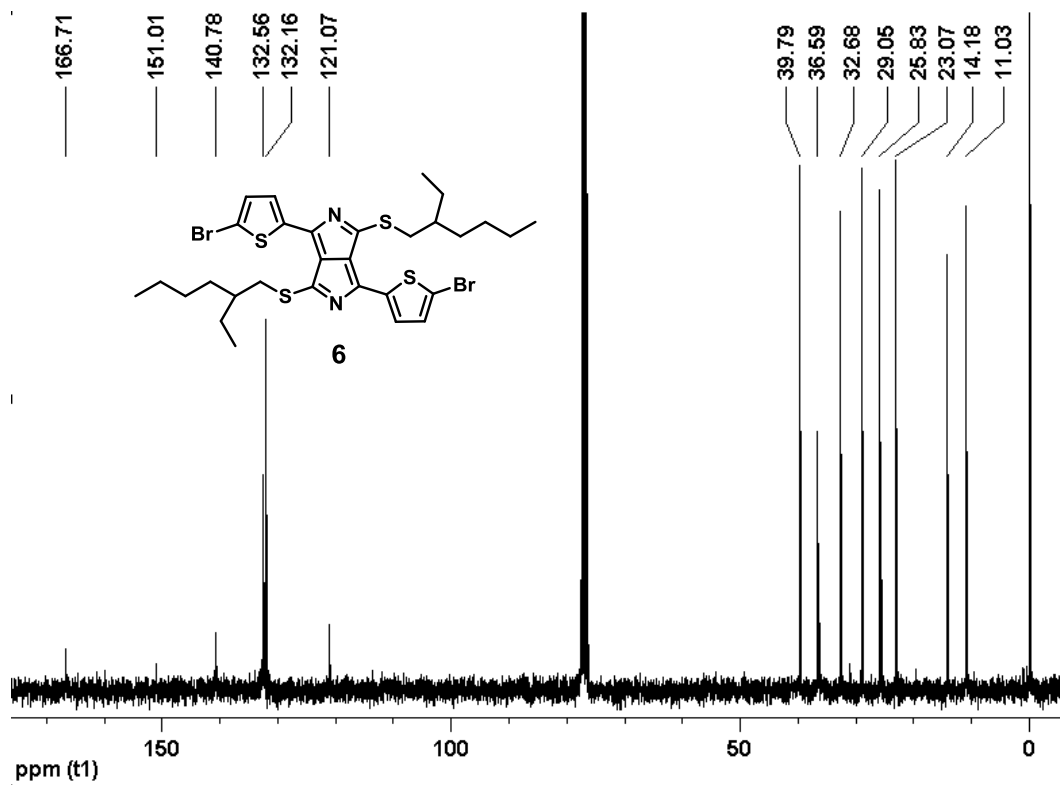

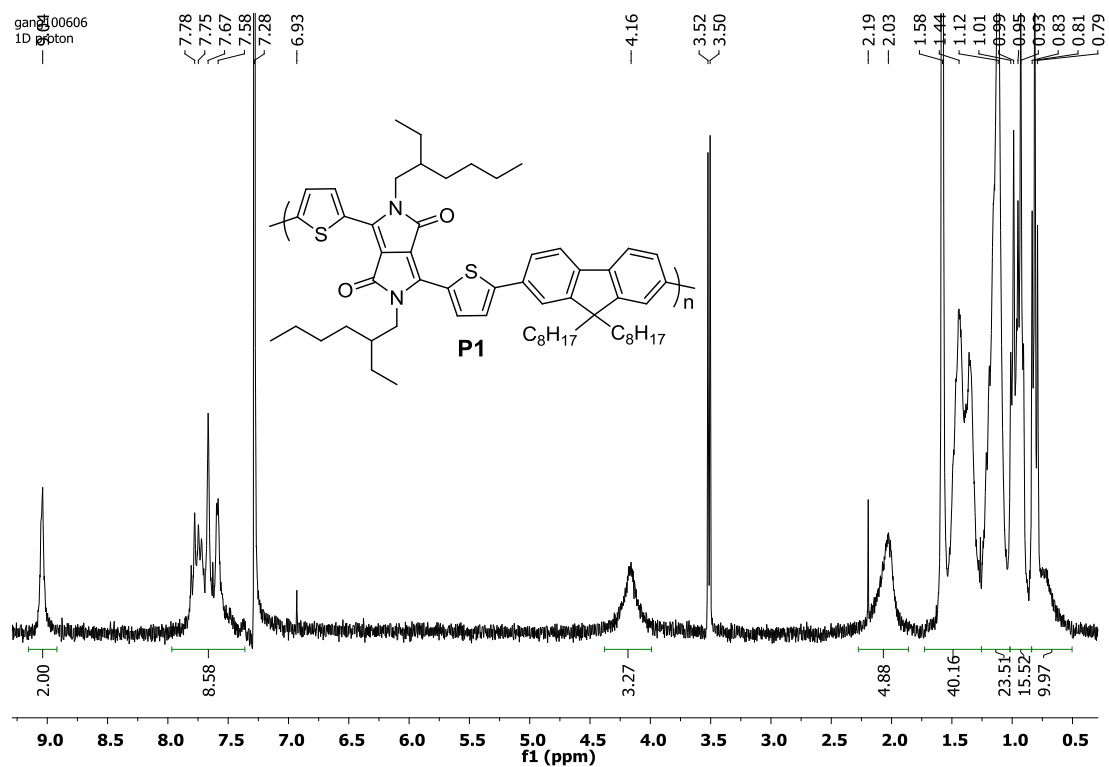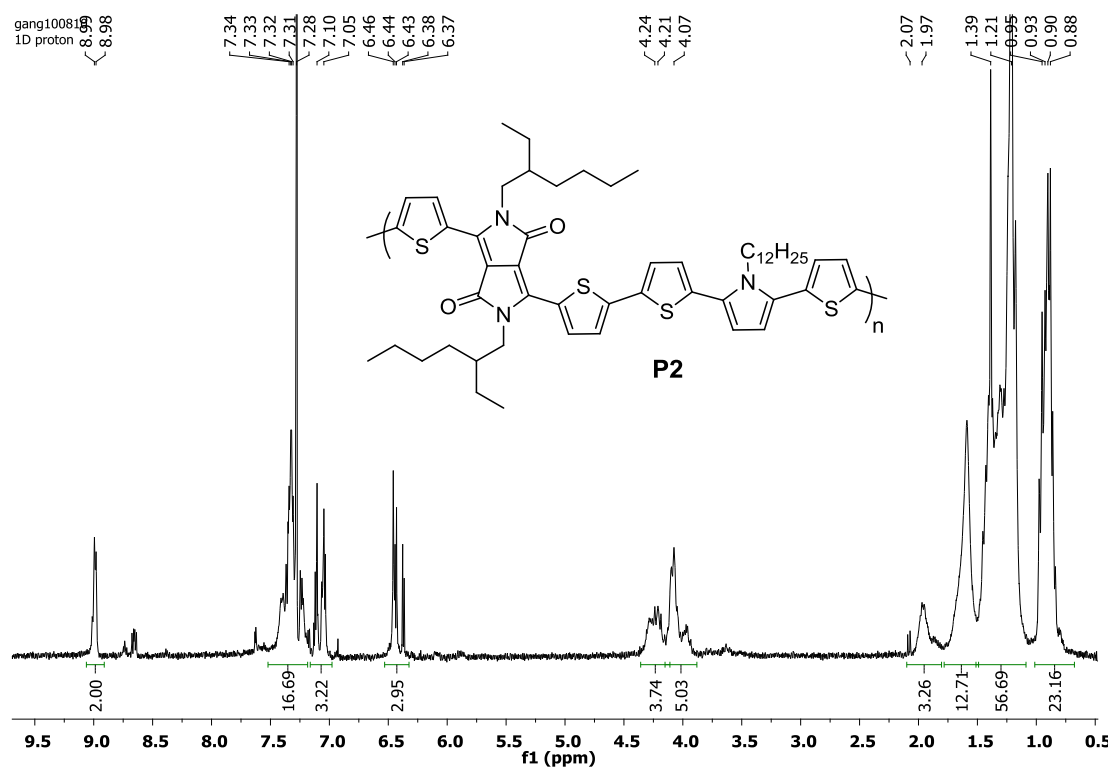

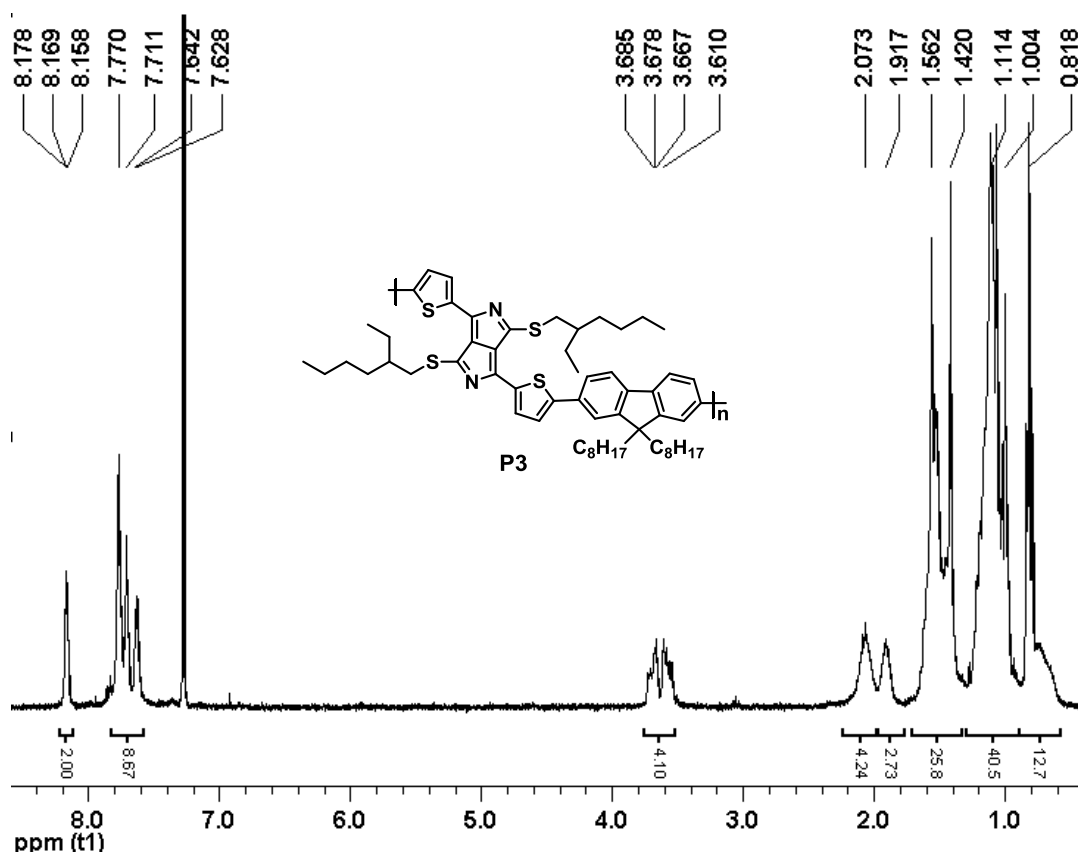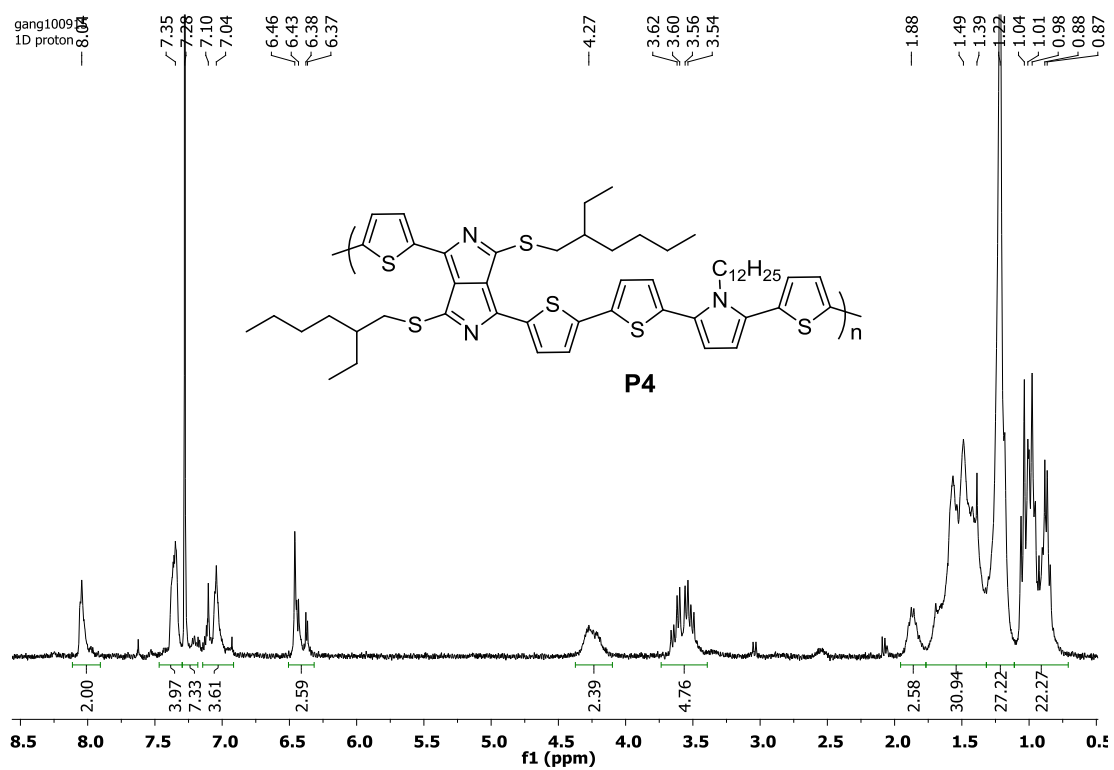

IonSpec HiResMALDI  
File: im-1\_MALDI.trans

Changchun Institute of Applied Chemistry

Mode: Positive  
Scans: 1

Date: 18-JAN-2011  
Time: 18:39:50  
Scale: 289.8871

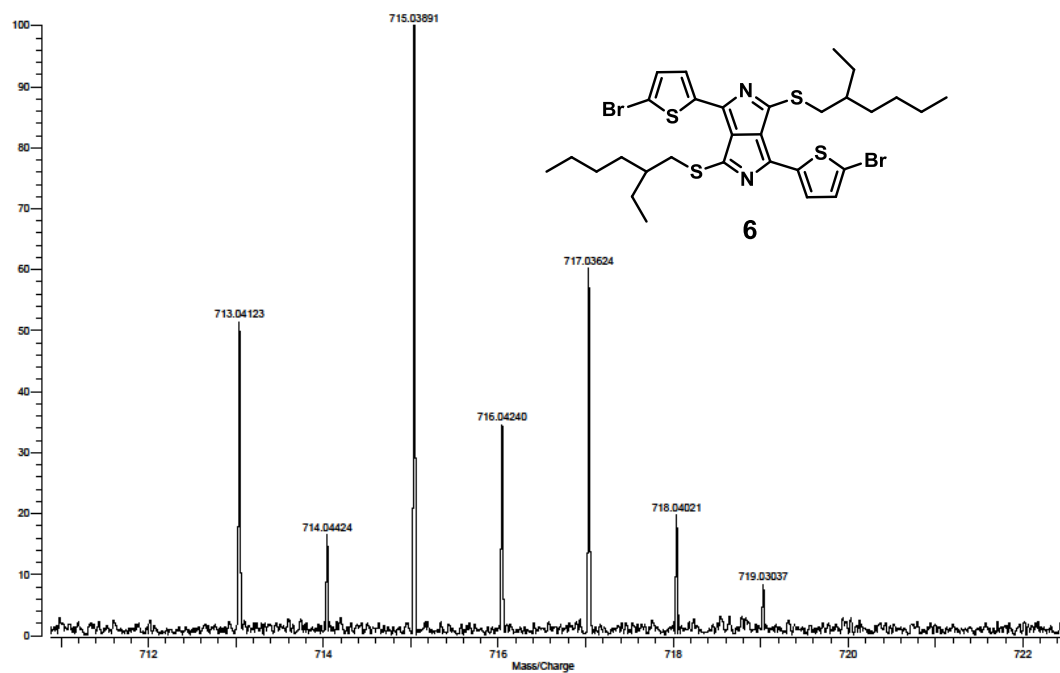

HRMS of **6**.
